# Supplementary material for: Elevated Procalcitonin Is Positively Associated with the Severity of COVID-19: A Meta-Analysis Based on 10 Cohort Studies
Source: MDPI journal article supplement (doi:10.3390/medicina57060594), 2021-06-09
Supplement: s1 [file s1]

**Elevated procalcitonin is positively associated  
with the severity of COVID-19: A meta-analysis  
based on 10 cohort studies**

**SUPPLEMENTARY FILE.**

**Figures & Tables**

**Table S1** Search terms

|                       |                                                                                                                                                                                                                                                                                                                                  |
|-----------------------|----------------------------------------------------------------------------------------------------------------------------------------------------------------------------------------------------------------------------------------------------------------------------------------------------------------------------------|
| <b>PubMed</b>         | (Procalcitonin OR PCT) AND (COVID-19 [Supplementary Concept] OR "severe acute respiratory syndrome coronavirus 2" [Supplementary Concept] OR SARS-CoV-2 OR "severe acute respiratory syndrome coronavirus 2" OR "novel coronavirus 2019" OR 2019-nCoV OR "coronavirus disease 2019" OR "novel coronavirus pneumonia")            |
| <b>Web of science</b> | TS = ('COVID-19' OR severe acute respiratory syndrome coronavirus 2' OR SARS-CoV-2' OR novel coronavirus 2019' OR 2019 nCoV' OR 'coronavirus disease 2019' OR novel coronavirus pneumonia')<br>TS = ('Procalcitonin' OR 'PCT' )                                                                                                  |
| <b>Embase</b>         | <b>COVID-19</b><br>'COVID-19': ti, ab OR 'severe acute respiratory syndrome coronavirus 2': ti, ab OR 'SARS-CoV-2': ti, ab OR 'novel coronavirus 2019': ti, ab OR '2019 nCoV': ti, ab OR 'coronavirus disease 2019': ti, ab OR 'novel coronavirus pneumonia': ti, ab<br><b>PCT</b><br>'Procalcitonin' : ti, ab OR 'PCT' : ti, ab |

**Table S2** Assessment of the risk of bias in each cohort study with the Newcastle-Ottawa scale in meta-analysis

| Author        | Year | Selection                     |                                   |                         |                       | Comparability              |                         | Outcome               |                         | Score |
|---------------|------|-------------------------------|-----------------------------------|-------------------------|-----------------------|----------------------------|-------------------------|-----------------------|-------------------------|-------|
|               |      | 1 Is the definition adequate? | 2 Representativeness of the cases | 3 Selection of controls | 4 Outcome of interest | 5 Comparability of cohorts | 6 Assessment of outcome | 7 Length of follow-up | 8 Adequacy of follow-up |       |
| Chen T        | 2020 | 1                             | 0                                 | 1                       | 1                     | 1                          | 1                       | 1                     | 1                       | 7     |
| Bahl A        | 2020 | 1                             | 1                                 | 1                       | 1                     | 1                          | 1                       | 1                     | 1                       | 8     |
| Nicholson CJ  | 2020 | 1                             | 1                                 | 0                       | 1                     | 1                          | 1                       | 1                     | 1                       | 7     |
| Zhao Z        | 2020 | 1                             | 1                                 | 1                       | 1                     | 1                          | 1                       | 1                     | 1                       | 8     |
| Chen R        | 2020 | 1                             | 1                                 | 1                       | 1                     | 1                          | 1                       | 1                     | 1                       | 8     |
| Su W          | 2020 | 1                             | 1                                 | 1                       | 0                     | 1                          | 1                       | 1                     | 1                       | 7     |
| Hou H         | 2020 | 1                             | 1                                 | 0                       | 1                     | 1                          | 1                       | 0                     | 1                       | 6     |
| Muhammad R    | 2021 | 0                             | 1                                 | 1                       | 1                     | 1                          | 1                       | 1                     | 1                       | 7     |
| Montrucchio G | 2021 | 1                             | 1                                 | 1                       | 0                     | 1                          | 1                       | 1                     | 0                       | 6     |
| Keski H       | 2021 | 1                             | 1                                 | 1                       | 1                     | 1                          | 1                       | 1                     | 1                       | 8     |
| Jiang M       | 2021 | 1                             | 1                                 | 1                       | 0                     | 1                          | 1                       | 1                     | 1                       | 7     |

Abbreviations: “1” indicates that the study has adequately defined exposure and “0” indications the opposite

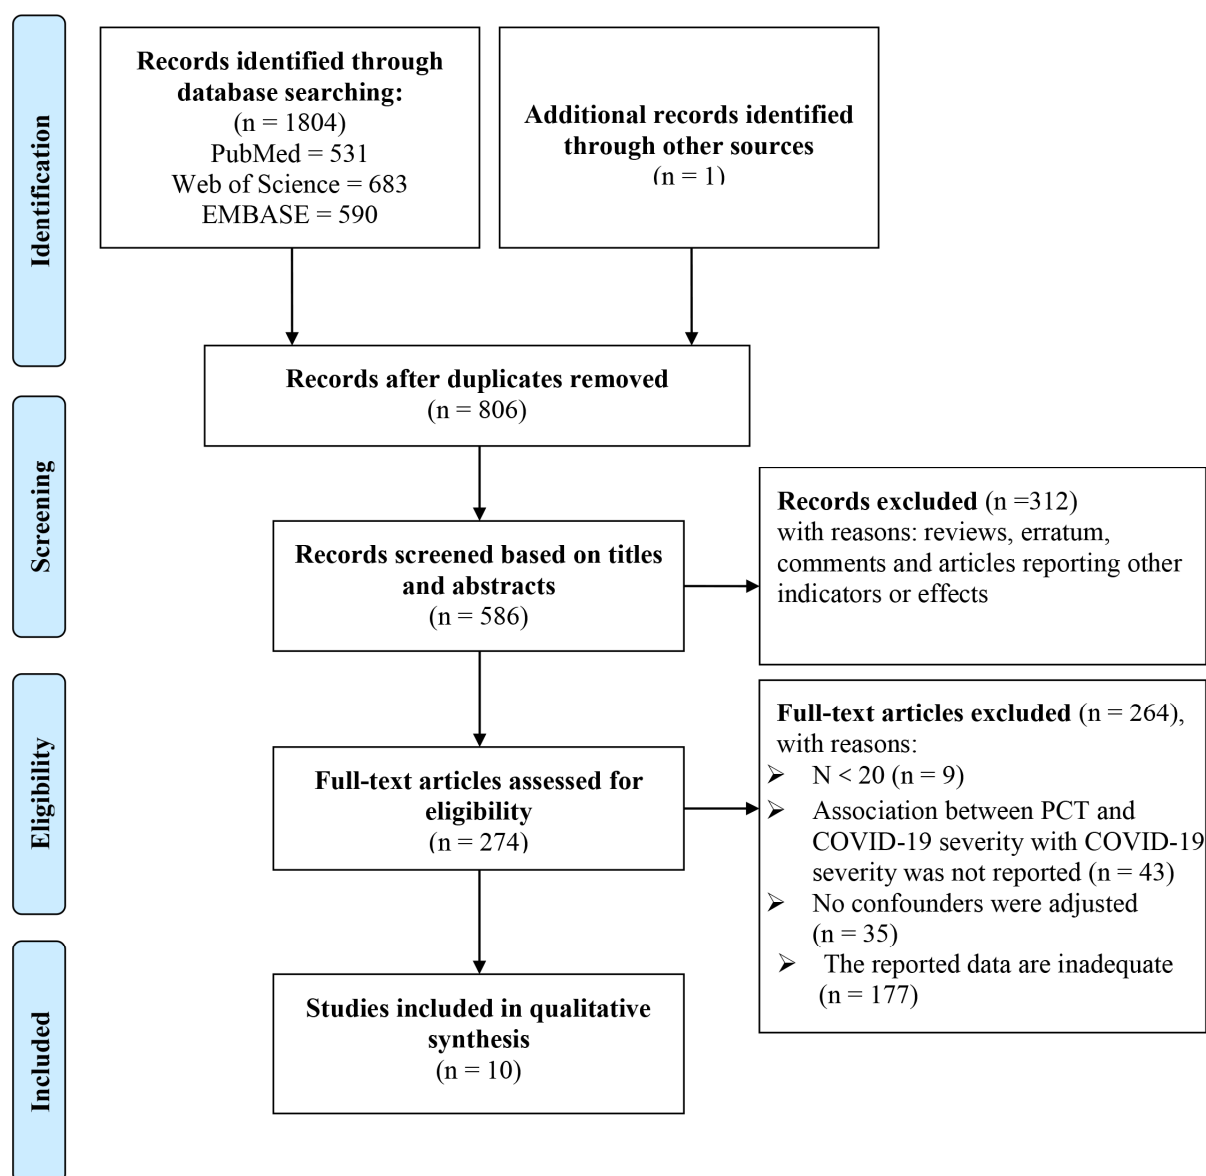

**Figure S1** Flow diagram of study selection

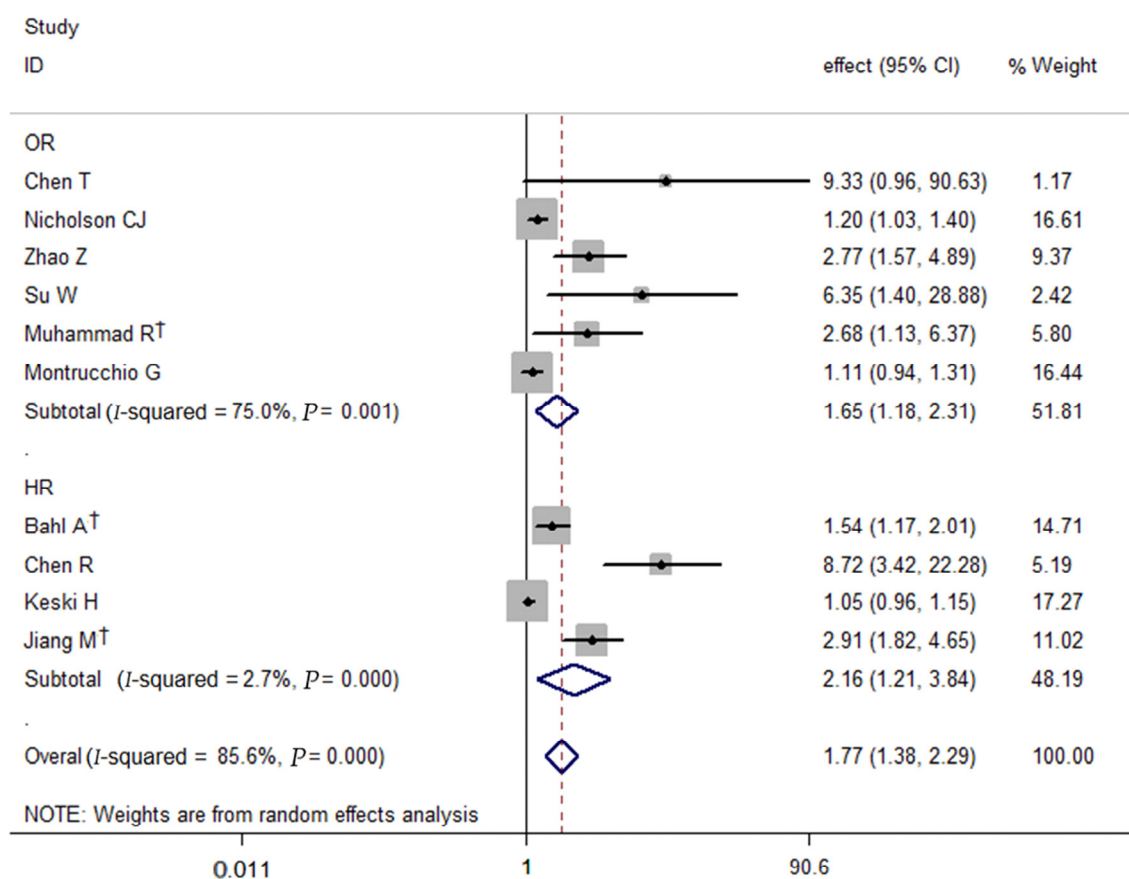

**Figure S2** Subgroup analysis based on effect estimates for the association between PCT and the severity of COVID-19. † indicates combined effects based on subgroups

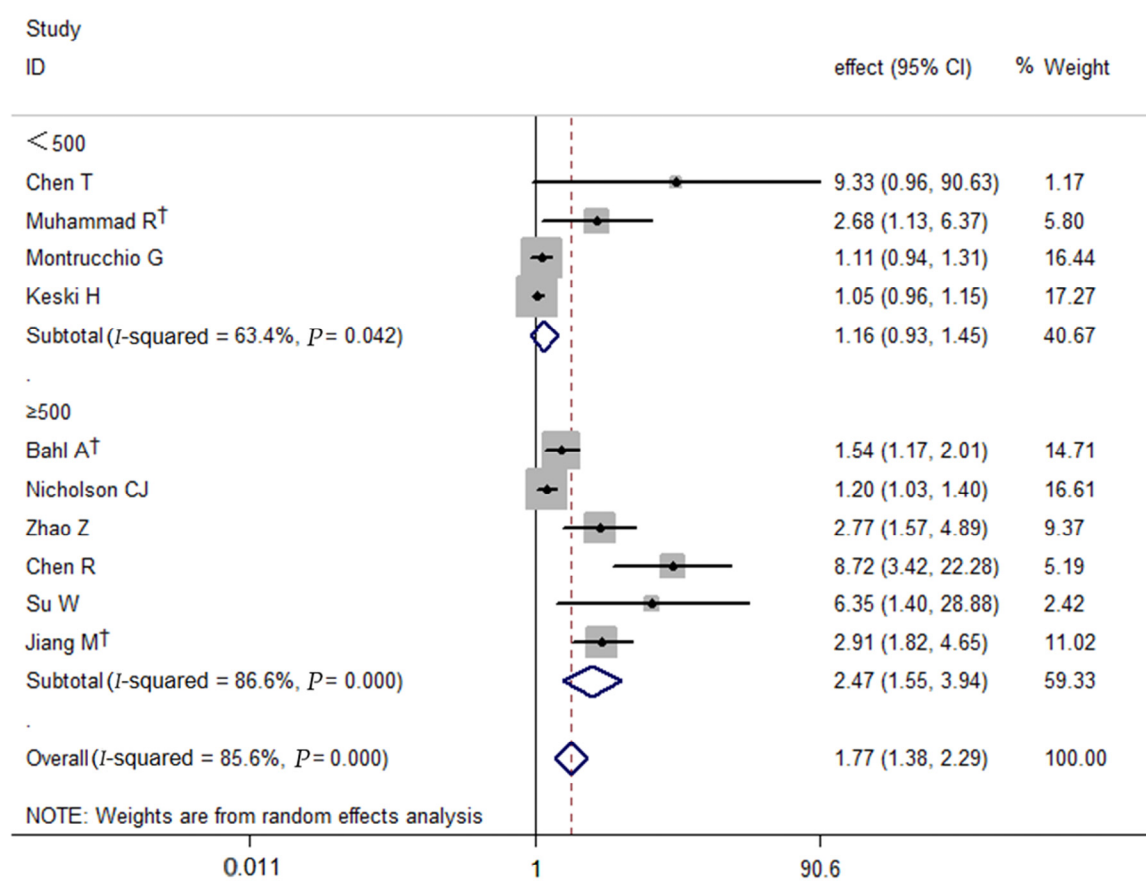

**Figure S3** Subgroup analysis based on sample size for the association between PCT and the severity of COVID-19. <sup>†</sup> indicates combined effects based on subgroups

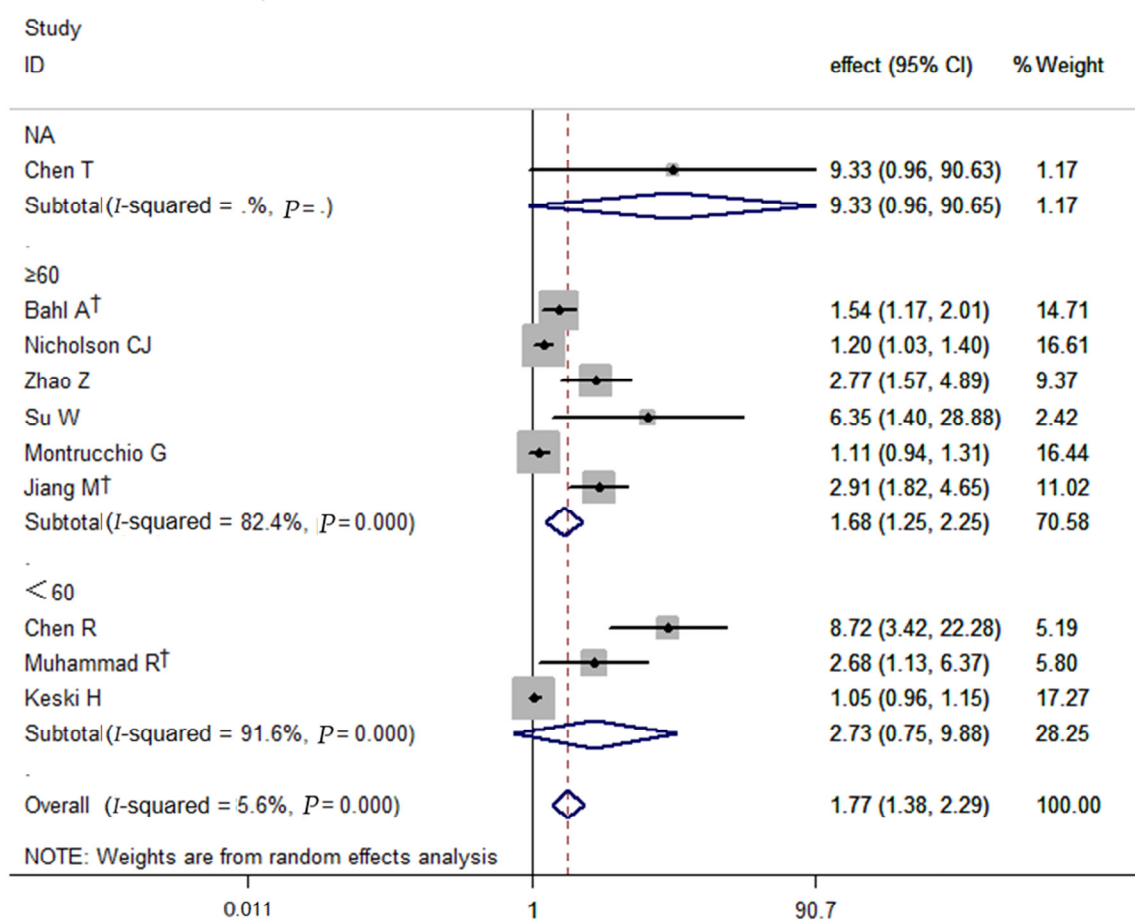

**Figure S4** Subgroup analysis based on age for the association between PCT and the severity of COVID-19. NR, not reported. <sup>†</sup> indicates combined effects based on subgroups

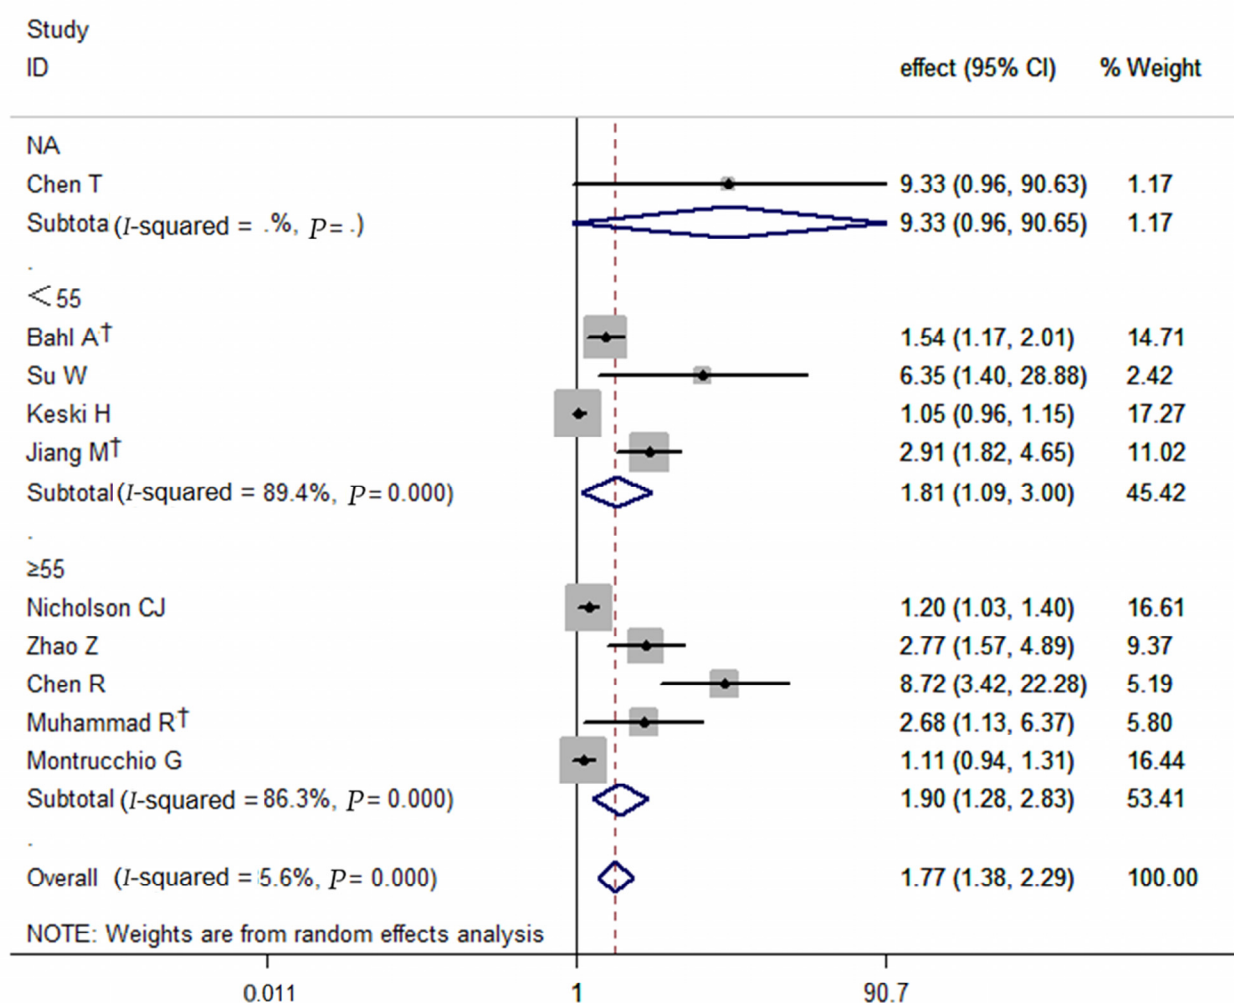

**Figure S5** Subgroup analysis based on sex (male, %) for the association between PCT and the severity of COVID-19. NR, not reported. <sup>†</sup> indicates combined effects based on subgroups



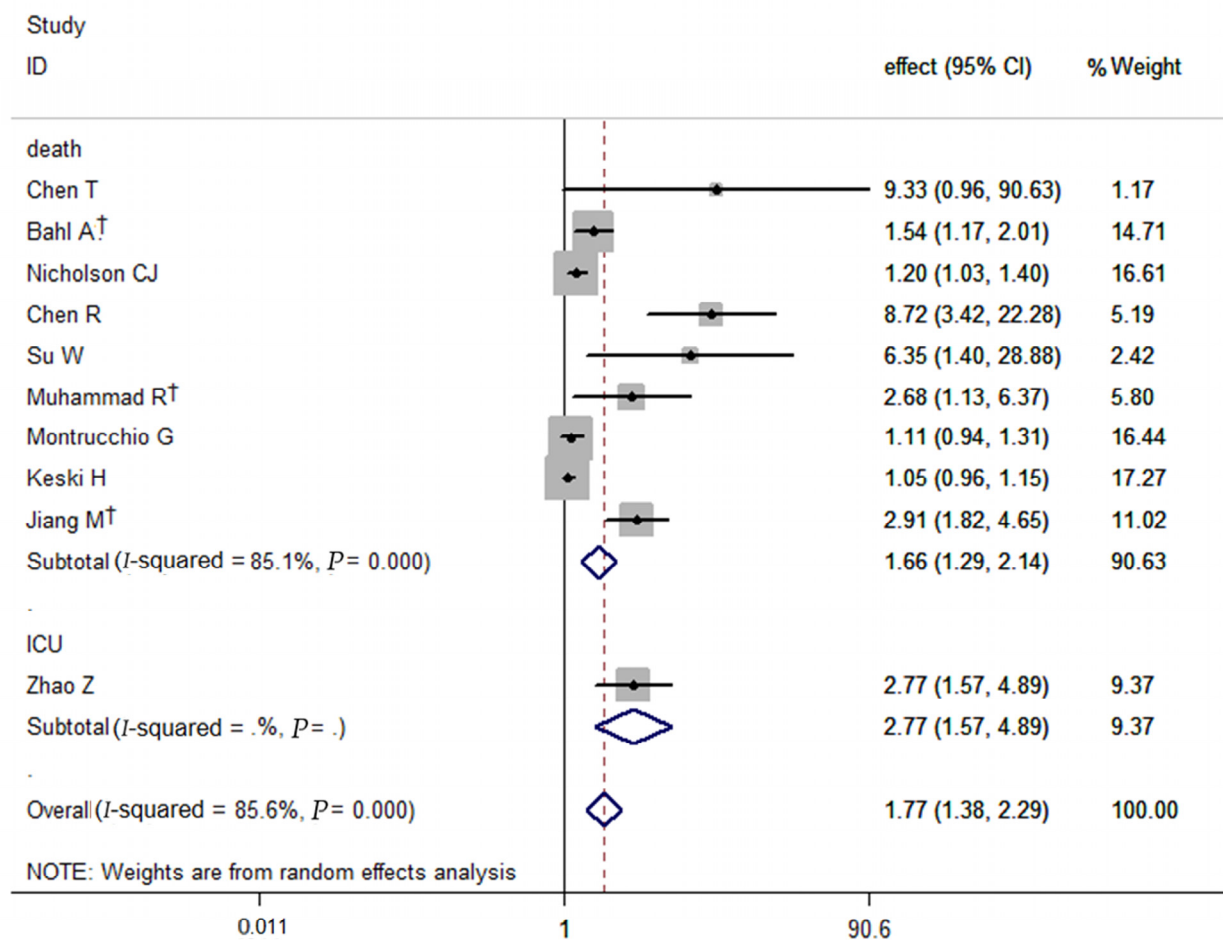

**Figure S6** Subgroup analysis based on outcome for the association between PCT and the severity of COVID-19. Others include severe, critical, mechanically ventilated, and ICU patients. <sup>†</sup> indicates combined effects based on subgroups

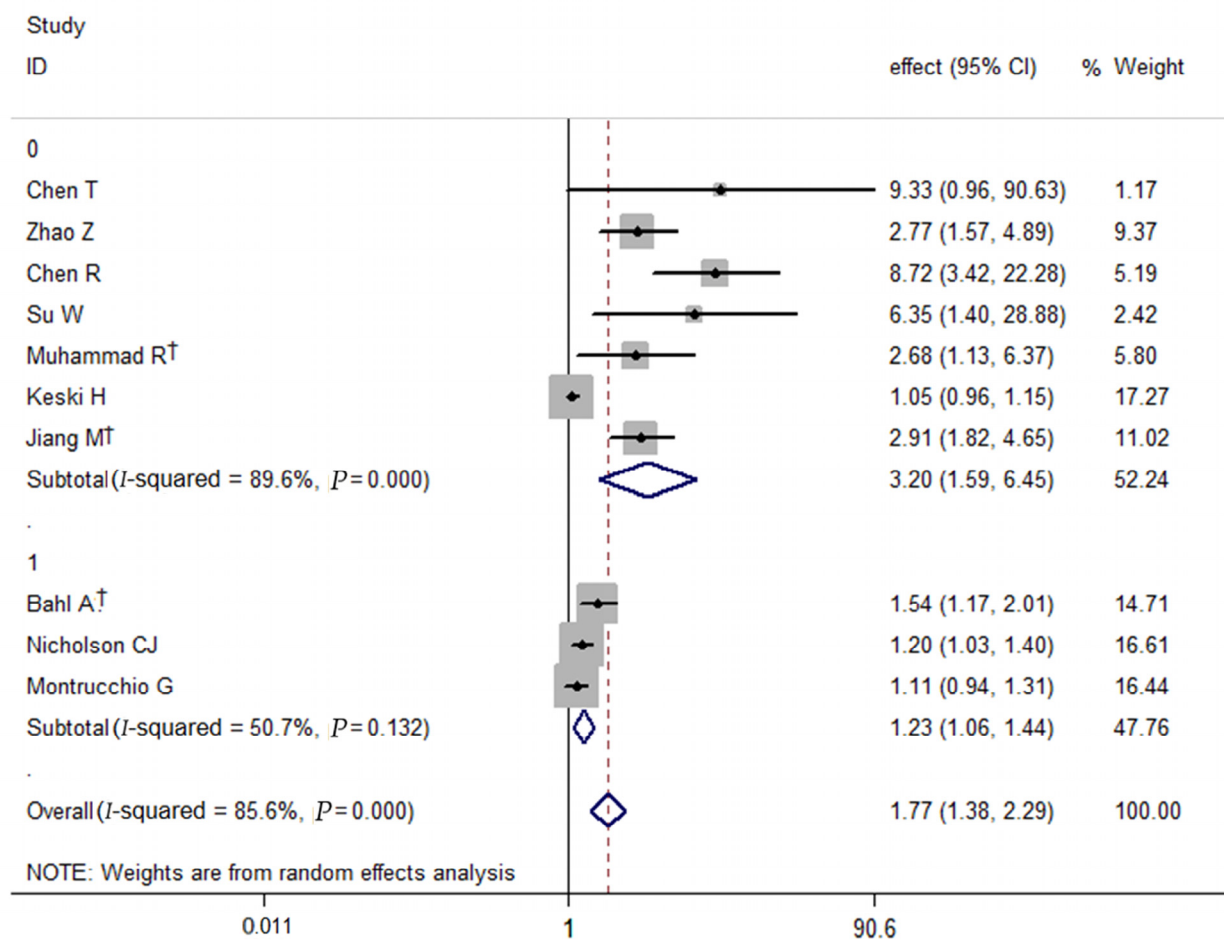

**Figure S7** Subgroup analysis based on diabetes for the association between PCT and the severity of COVID-19. “1” indicates the study adjusted for diabetes. “0” indicates the study unadjusted for diabetes. <sup>†</sup> indicates combined effects based on subgroups

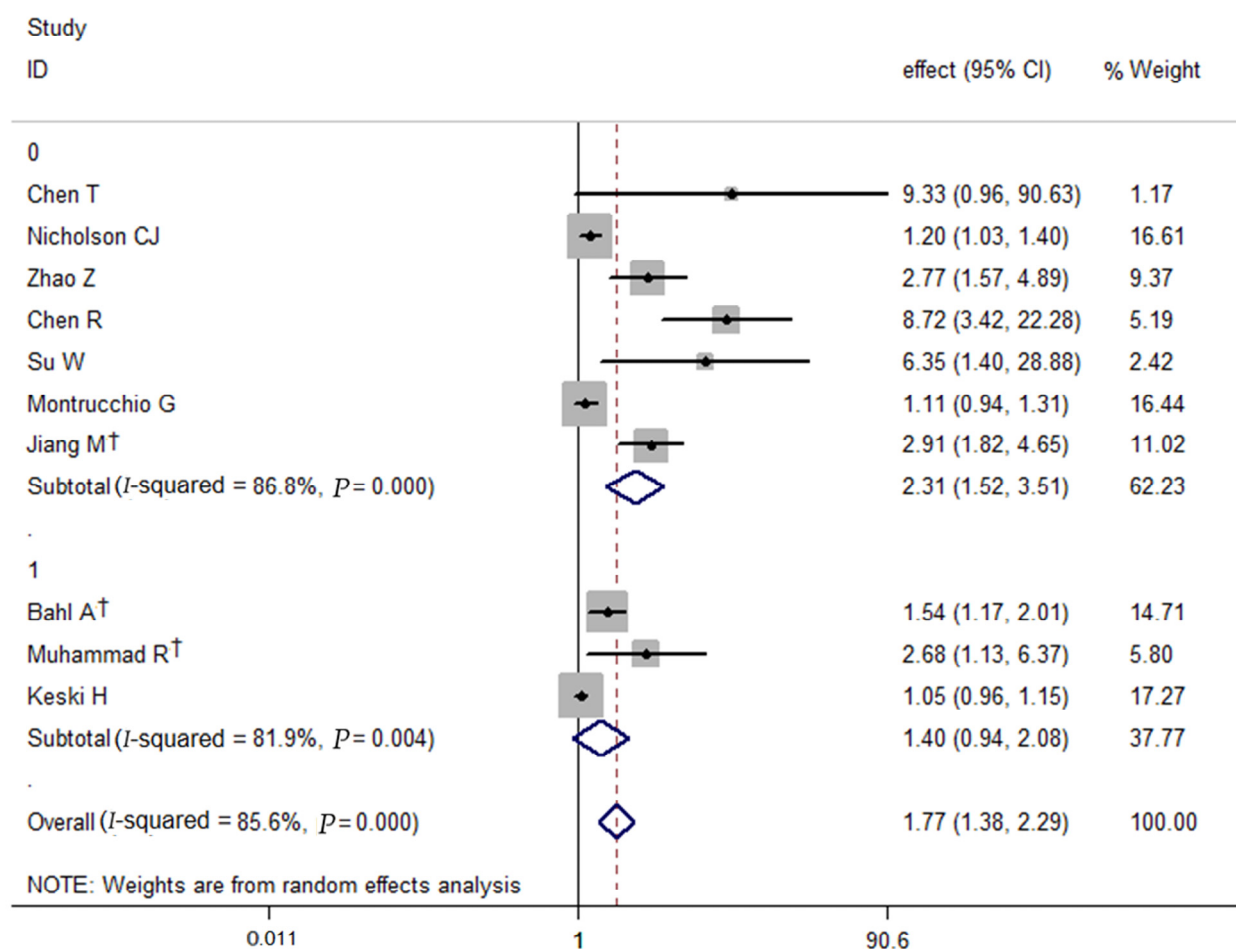

**Figure S8** Subgroup analysis based on hypertension for the association between PCT and the severity of COVID-19. “1” indicates the study adjusted for hypertension. “0” indicates the study unadjusted for hypertension. † indicates combined effects based on subgroups
